# Supplementary material for: Effects of side reactions on the kinetics of nanoporous gold formation revealed by real-time X-ray scattering during electrolytic dealloying
Source: Royal Society of Chemistry journal article supplement (doi:10.1039/d1ta04822h), 2021-01-01
Supplement: d1ta04822h1.pdf [file d1ta04822h1.pdf]

## Supporting Information

### Effects of side reactions on the kinetics of nanoporous gold formation revealed by real-time X-ray scattering during electrolytic dealloying

Samuel S. Welborn,<sup>1,2</sup> John S. Corsi,<sup>1,2</sup> Lin Wang,<sup>1</sup> Asaph Lee,<sup>1,3</sup> Jintao Fu,<sup>1</sup> Eric Detsi<sup>1,2</sup>

<sup>1</sup>Department of Materials Science & Engineering, University of Pennsylvania, Philadelphia PA 19104-6272, USA.

<sup>2</sup>Vagelos Institute for Energy Science and Technology (VIEST), Philadelphia, PA 19104, USA.

<sup>3</sup>Department of Physics and Astronomy, University of Pennsylvania, Philadelphia, Pennsylvania 19104, USA

\*Correspondence should be addressed to E.D. ([detsi@seas.upenn.edu](mailto:detsi@seas.upenn.edu))

### Supporting Video Content

Supporting Videos 1-3 are attached.

- **Supporting Video 1.** This is a video of dealloying in HNO<sub>3</sub> in the stacked configuration (**Fig. S2g**) at 950 mV vs. Ag/AgCl. The dealloying current can be seen in **Fig. S3**, which is similar to that found in the side-by-side configuration. It is clear from the color change that the film is being dealloyed, which is also what we observed in the side-by-side configuration.
- **Supporting Video 2.** *In situ* dealloying data in HNO<sub>3</sub>. One can see how the SAXS, WAXS, current, and charge evolve with respect to dealloying time. No new WAXS peaks appear during dealloying in HNO<sub>3</sub>.
- **Supporting Video 3.** *In situ* dealloying data in HClO<sub>4</sub>. One can see how the SAXS, WAXS, current, and charge evolve with respect to dealloying time. New WAXS peaks appear during dealloying in HClO<sub>4</sub>, corresponding to AgCl growth as Ag is removed from the parent alloy.

## Supporting Figures

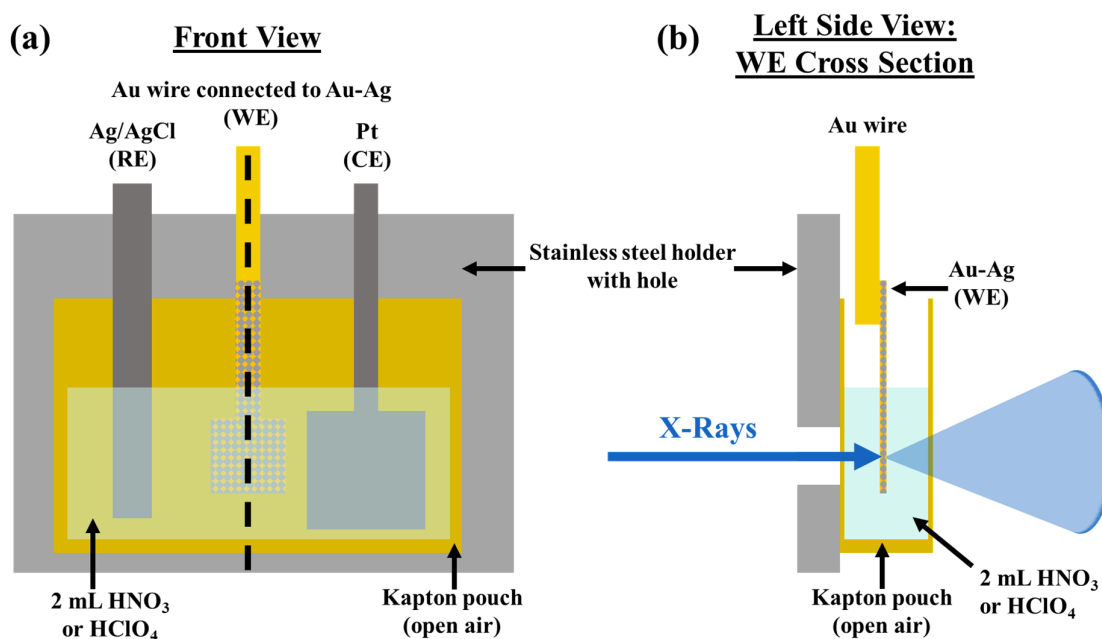

**Fig. S1.** Detailed diagram of side-by-side *in situ* configuration in **Fig. S2f**. (a) Front view. A Kapton pouch cell is filled with 2 mL of either electrolyte (HNO<sub>3</sub> or HClO<sub>4</sub>), and three electrodes are placed inside. The Au-Ag working electrode (WE), the Pt counter electrode (CE), and the Ag/AgCl reference electrode (RE) are placed inside the electrolyte in a side-by-side configuration. The dashed black line through the WE in (a) is to show the cross section shown in (b), a left-side view of the *in situ* cell at the WE. X-rays (blue arrow) travel through a hole in the stainless-steel holder and interact with the Kapton pouch cell, the electrolyte, and the WE.

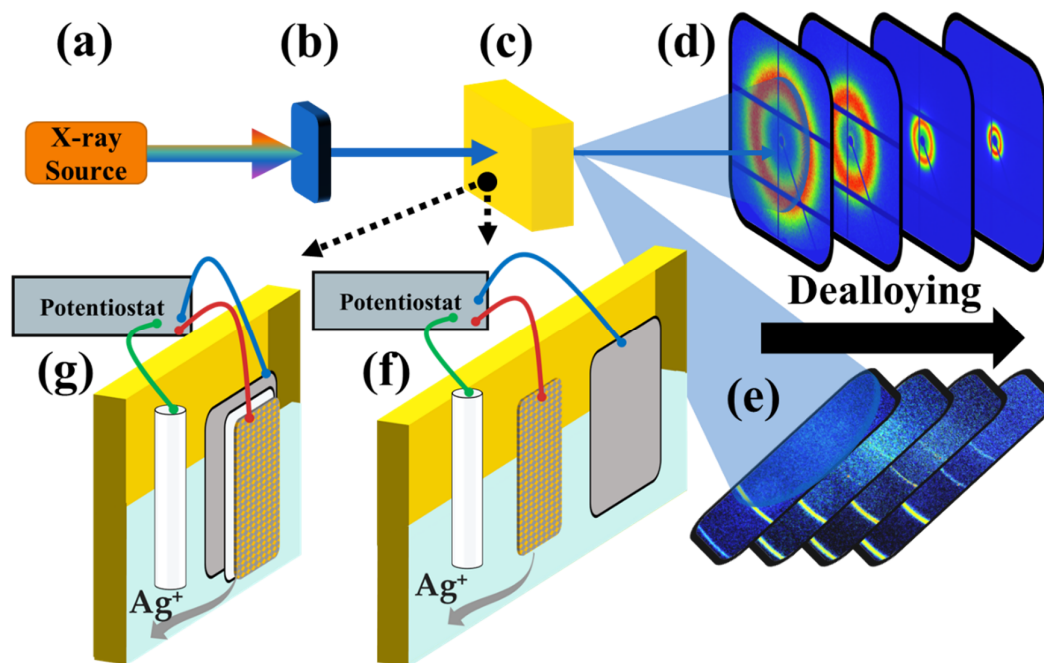

**Fig. S2.** X-ray scattering setup: (a) Multichromatic copper X-ray source. (b) Monochromation and collimation optics. (c) *In situ* pouch cell. (d) SAXS detector showing changes in microstructure during dealloying and (e) WAXS detector, showing changes in crystal structure during dealloying. (f) Side-by-side three-electrode *in situ* pouch cell configuration complete with Au-Ag parent alloy used as working electrode (red wire), Pt foil as the counter electrode (blue wire), and Ag/AgCl used as the reference electrode. This side-by-side configuration avoids unwanted scattering from the counter electrode and separator, as shown in the stacked configuration in (g).

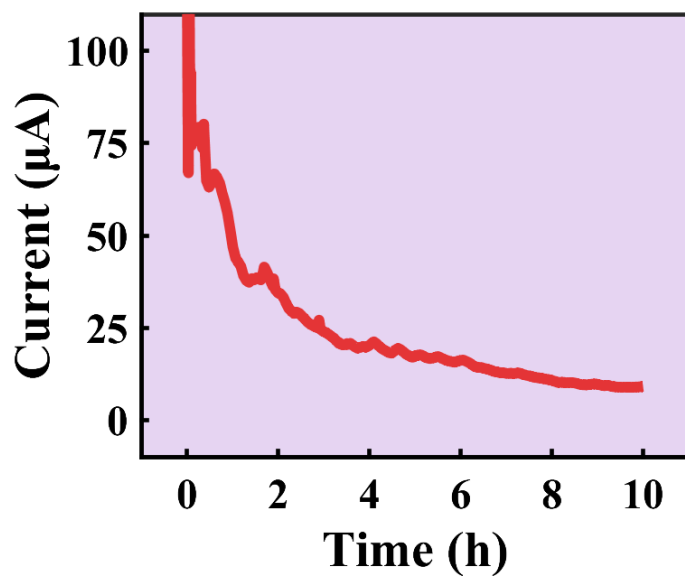

**Fig. S3.** *Ex situ* dealloying current for the stacked configuration found in **Fig. S2g** using 2 mL of 1 M  $\text{HNO}_3$ . An accompanying video is shown in **Supporting Video 1**, where one can see the obvious color change of the film, typical of dealloying.

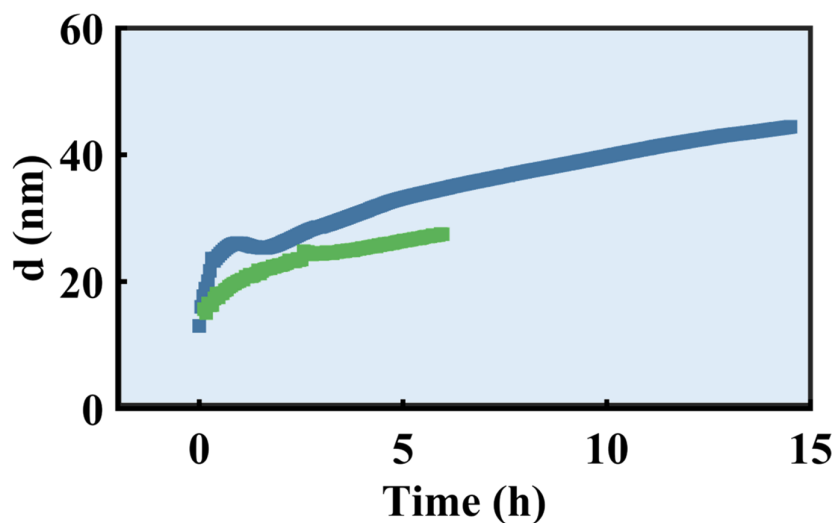

**Fig. S4.**  $d$  vs. time curves for two *in situ* dealloying experiments performed in  $\text{HClO}_4$ . The blue curve is the  $d$  vs. time curve shown in the manuscript, and the green curve is from another, shorter dealloying experiment not shown in the manuscript.

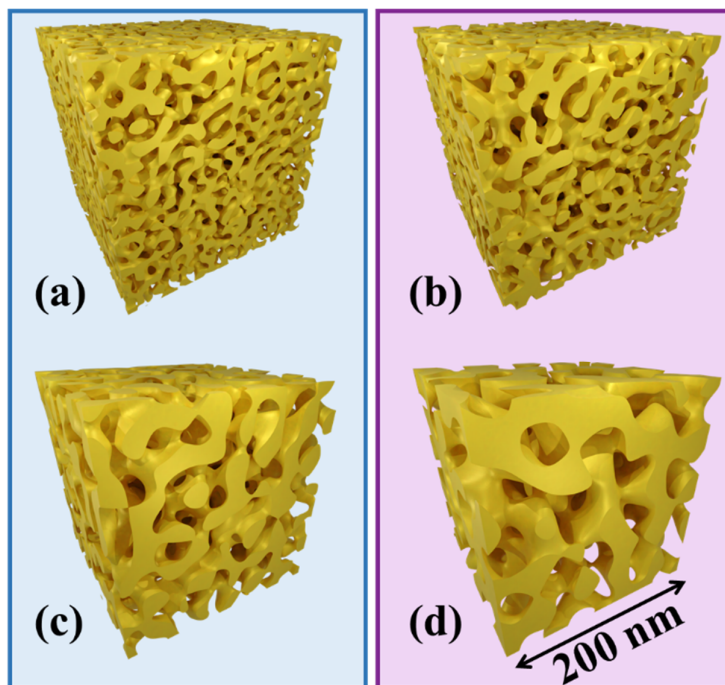

**Fig. S5.** Gaussian Random Field<sup>1-3</sup> models generated at various points during dealloying using the experimental data found in **Fig. 3e** in the main manuscript. We have reported how to create these structures in a previous work.<sup>4</sup> At the beginning stages of dealloying in HClO<sub>4</sub> (a) and HNO<sub>3</sub> (b), the structure size is similar: ~13 and ~16 nm, respectively. By 2 hours of dealloying time, the structure size of the HClO<sub>4</sub> (c) is smaller than that of HNO<sub>3</sub> (d): ~26 and ~40 nm, respectively. The side lengths of the simulated cubes are all 200 nm.

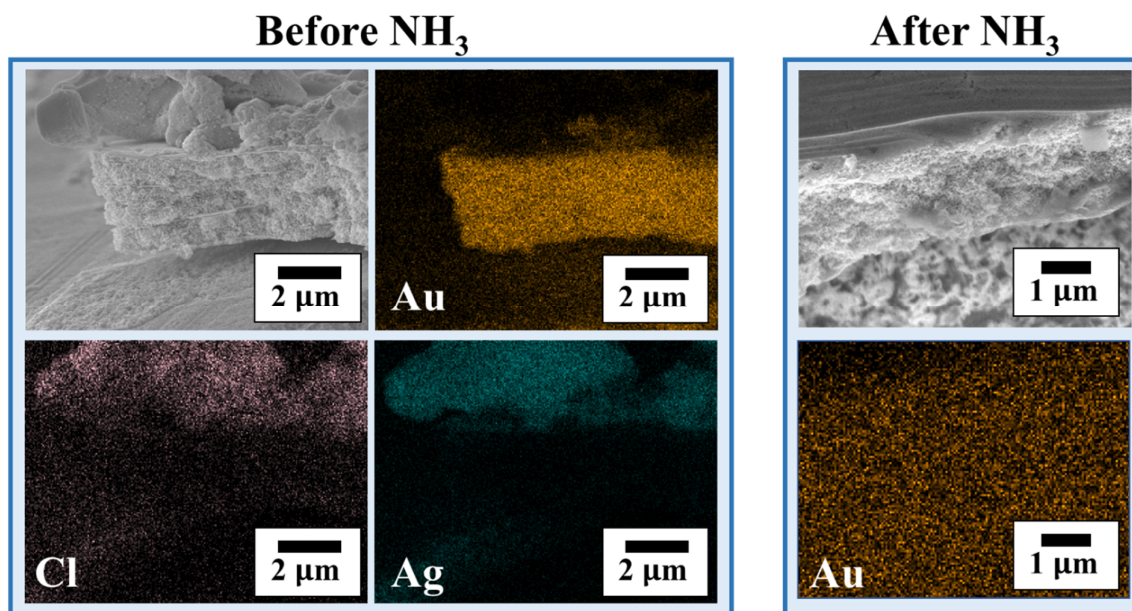

**Fig. S6.** EDX maps of nanoporous gold after *in situ* dealloying in HClO<sub>4</sub> (left), and the same sample washed in concentrated NH<sub>3</sub> (right). EDX shows that the dense film on the top of the NP-Au consists primarily of Ag and Cl (i.e. AgCl). After washing in NH<sub>3</sub>, the sample is composed of Au, and the AgCl film at the surface has disappeared.

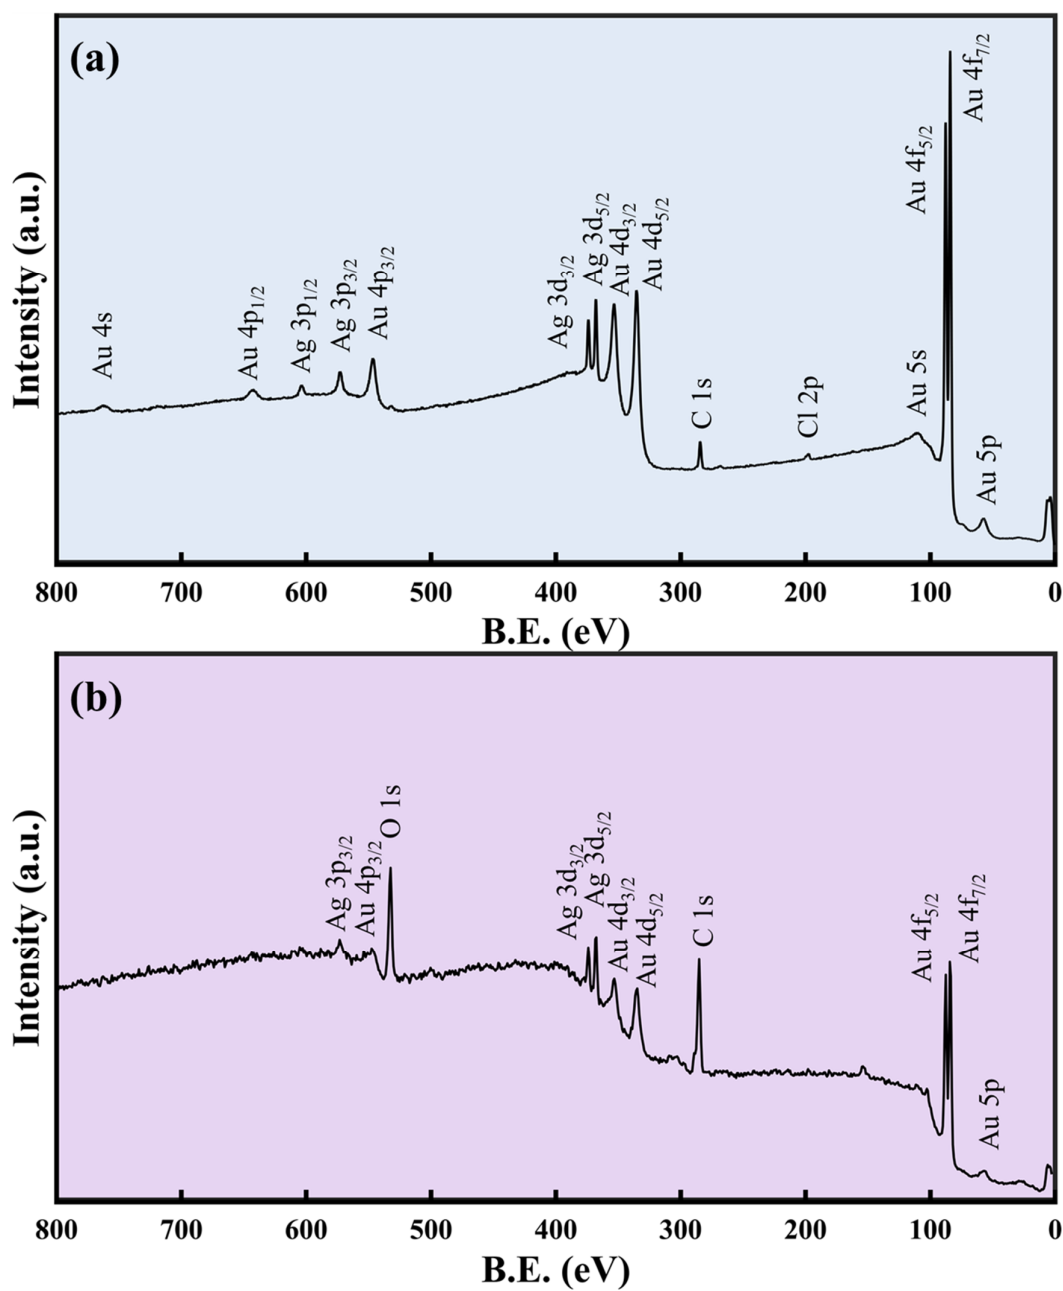

**Fig. S7.** XPS surveys of (a) HClO<sub>4</sub>-dealloyed sample dealloyed in 20 mL electrolyte, and (b) HNO<sub>3</sub>-dealloyed ex situ sample dealloyed in 20 mL electrolyte.

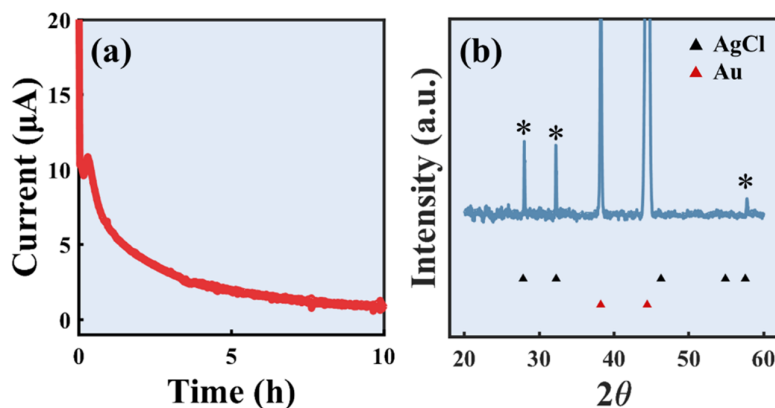

**Fig. S8.** (a) Current vs. time in an experiment using an Hg/Hg<sub>2</sub>SO<sub>4</sub> reference electrode which does not contain Cl<sup>-</sup> ions, and (b) X-ray diffraction pattern of the sample dealloyed in (a). AgCl peaks are shown in asterisks, and match with three of the peaks found in the black triangle pattern (PDF # 31-1238).

## References

- 1 S. S. Welborn and E. Detsi, *Nanoscale Horizons*, 2020, **5**, 12–24.
- 2 Y. Li, B.-N. Dinh Ngô, J. Markmann and J. Weissmüller, *Phys. Rev. Mater.*, 2019, **3**, 76001.
- 3 C. Soyarslan, S. Bargmann, M. Pradas and J. Weissmüller, *Acta Mater.*, 2018, **149**, 326–340.
- 4 S. S. Welborn, S. Van Der Meer, J. S. Corsi, J. T. M. De Hosson and E. Detsi, *ACS Appl. Mater. Interfaces*, 2021, **13**, 11721–11731.
